# Supplementary material for: Influence of pH-neutral lithium polystyrenesulfonate polyelectrolyte on the energy band structure and performance of organic solar cells
Source: Royal Society of Chemistry journal article supplement (doi:10.1039/d1ma00913c), 2022-01-01
Supplement: d1ma00913c1.pdf [file d1ma00913c1.pdf]

## Supporting Information for: Influence of pH-Neutral Lithium Polystyrenesulfonate Polyelectrolyte on the Energy Band Structure and Performance of Organic Solar Cells

Merve Nur Ekmekci,<sup>a</sup> Ju Hwan Kang,<sup>a</sup> Yeasin Khan,<sup>a,b</sup> Jung Hwa Seo<sup>a,\*</sup> and Bright Walker<sup>b,\*</sup>

<sup>a</sup>*Department of Semiconductors and Chemical Engineering (BK21 FOUR), Dong-A University,  
Busan, 49315, Republic of Korea*

<sup>b</sup>*Department of Chemistry, Kyung Hee University, Seoul, 02453, Republic of Korea*

seojh@dau.ac.kr and [walker@khu.ac.kr](mailto:walker@khu.ac.kr)

### Contents:

|                                                                                                                                                    |         |
|----------------------------------------------------------------------------------------------------------------------------------------------------|---------|
| <b>Figure S1.</b> Photograph of pH paper results and stability of PTB7 films in acidic environments.                                               | p. 2    |
| <b>Table S1.</b> Composition of hole transport layers used for PSCs and pH values of Li:PSS and PEDOT:PSS doped films.                             | p. 3.   |
| <b>Figure S2-S3.</b> Current density vs. voltage curves of all devices measured under simulated AM1.5G solar light and under dark and EQE spectra. | p. 4-5. |
| <b>Table S2.</b> All device parameters of OSCs based on different concentrations of Li:PSS solutions.                                              | p. 6.   |
| <b>Figure S4.</b> Topographic AFM images (size: 5 $\mu\text{m}$ x 5 $\mu\text{m}$ ) of the samples.                                                | p. 7.   |
| <b>Figure S5.</b> Topographic AFM images (size: 2 $\mu\text{m}$ x 2 $\mu\text{m}$ ) of the samples.                                                | p. 8.   |
| <b>Figure S6.</b> XPS and UPS spectra of PEDOT:PSS, Li:PSS 0, Li:PSS A10 and Li:PSS M30 deposited on the top of ITO.                               | p. 9.   |
| <b>Figure S7.</b> pH and WF with different concentrations of Li:PSS and PEDOT:PSS.                                                                 | p. 10.  |
| <b>Figure S8.</b> The UV-Vis absorbance spectrum.                                                                                                  | p. 11.  |

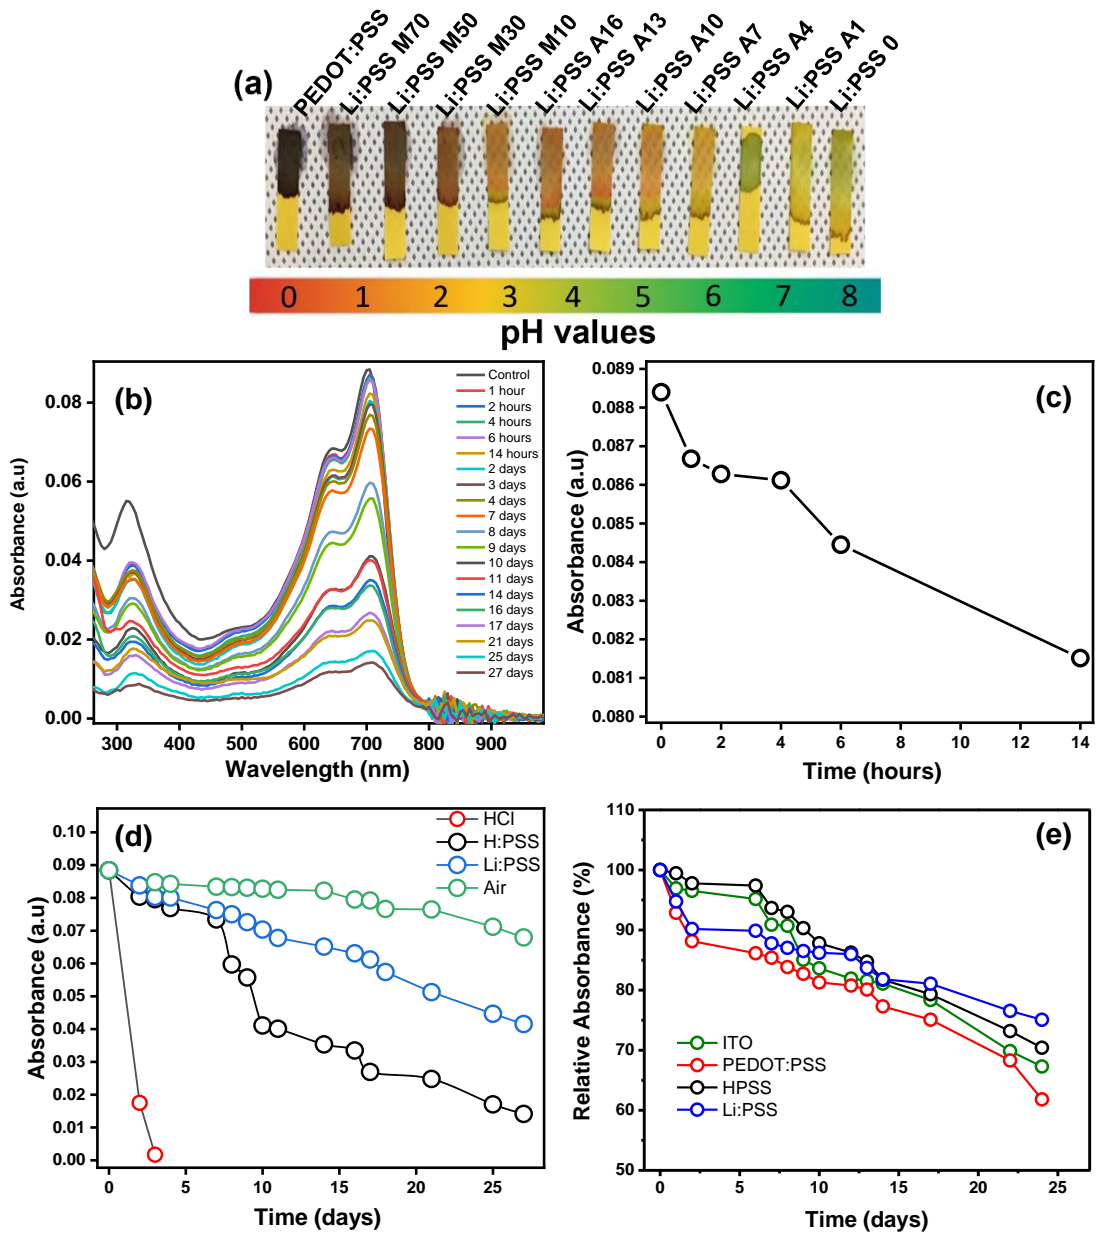

**Figure S1.** PTB7 Stability in acid. (a) Photograph of pH paper tests for each HTL solution used in the study. (b) Representative absorption spectra of PTB7 films over time during immersion in a 0.1 wt % (5.4 mM) solution of polystyrene sulfonic acid (H:PSS). (c) Absorption at 705 nm of a PTB7 film immersed in a 0.1 wt % (5.4 mM) solution of polystyrene sulfonic acid (H:PSS). (d) Comparison of absorbance at 705 nm vs. time for PTB7 films immersed in 2M HCl solution, 0.1 wt % H:PSS solution, 0.1 wt % Li:PSS solution, and dry PTB7 films in air. (e) Comparison of absorbance at 705 nm vs. time for PTB7 films deposited on ITO, ITO/PEDOT:PSS, ITO/H:PSS and ITO/Li:PSS substrates and exposed to ambient air.

**Table S1.** Composition of hole transport layers used for PSCs and pH values of Li:PSS and PEDOT:PSS doped films.

| Hole Transport Layer                      | Thickness (nm) | Volume of PEDOT:PSS Soln. <sup>a</sup> | pH <sup>b</sup> |
|-------------------------------------------|----------------|----------------------------------------|-----------------|
| Li:PSS 0                                  | 1.62           | 0 $\mu$ L                              | 6.36            |
|                                           | 2.00           | 0 $\mu$ L                              | 6.36            |
|                                           | 2.27           | 0 $\mu$ L                              | 6.36            |
|                                           | 2.54           | 0 $\mu$ L                              | 6.36            |
| Li:PSS A1                                 | 2              | 10 $\mu$ L                             | 4.13            |
| Li:PSS A4                                 | 4              | 40 $\mu$ L                             | 3.08            |
| Li:PSS A7                                 | 6.3            | 70 $\mu$ L                             | 2.71            |
| Li:PSS A10                                | 7.3            | 100 $\mu$ L                            | 2.59            |
| Li:PSS A13                                | 8              | 130 $\mu$ L                            | 2.52            |
| Li:PSS A16                                | 9              | 160 $\mu$ L                            | 2.39            |
| Ratio (Li:PSS) / (PEDOT:PSS) <sup>d</sup> |                |                                        |                 |
| Li:PSS M10                                | 20.41          | 90 / 10                                | 2.53            |
| Li:PSS M30                                | 40.36          | 70 / 30                                | 1.94            |
| Li:PSS M50                                | 43.06          | 50 / 50                                | 1.68            |
| Li:PSS M70                                | 44             | 30 / 70                                | 1.50            |
| PEDOT:PSS <sup>e</sup>                    | 43             | 0 / 100                                | 1.21            |

a) Volume of commercial PEDOT:PSS solution added to dilute (0.005 wt%) soln of 1 ml Li:PSS in H<sub>2</sub>O.

b) SI Analytics / Lab 850.

c) Dilute (0.005 wt%) soln. of Li:PSS in H<sub>2</sub>O.

d) Volume ratio of dilute Li:PSS soln to commercial PEDOT:PSS soln.

e) Commercial PEDOT:PSS solution.

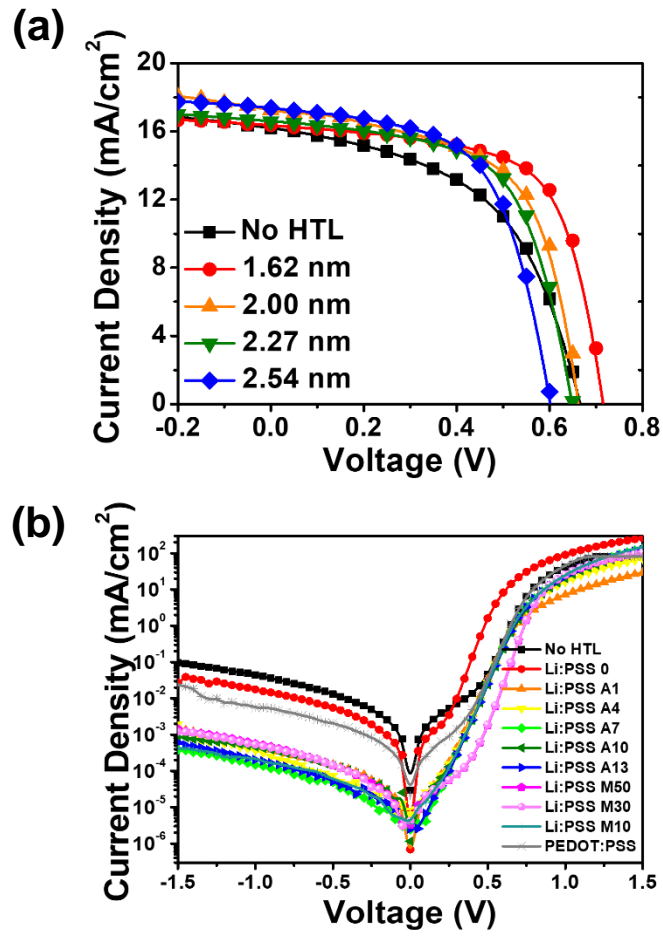

**Figure S2.** Current density vs. voltage curves of PTB7:PC<sub>71</sub>BM solar cells measured (a) under simulated AM1.5G solar light and (b) in the dark.

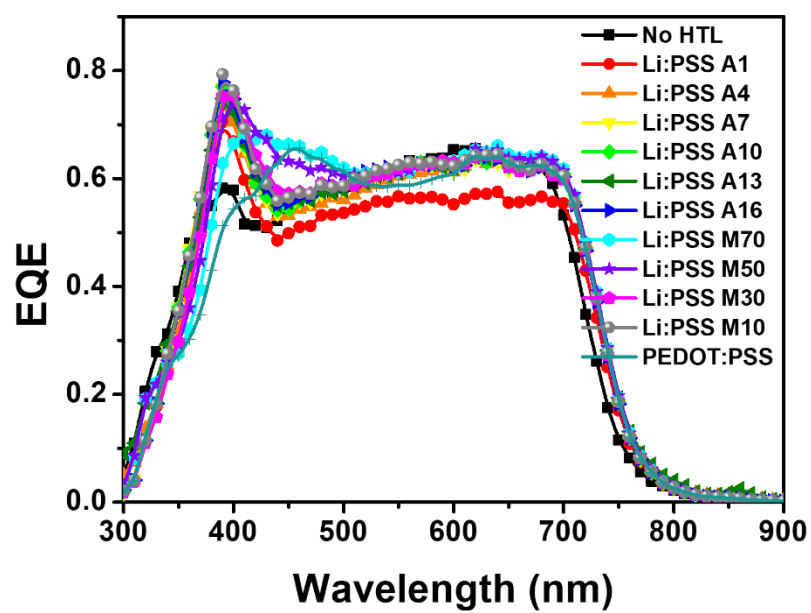

Figure S3. EQE spectra for devices with different HTL formulations.

**Table S2.** Summary of device parameters for OSCs using different HTL formulations compared to reference devices with no HTL and pure PEDOT:PSS.

| HTL        | $J_{SC}$<br>(mA/cm <sup>2</sup> ) | Spectral $J_{SC}$<br>(mA/cm <sup>2</sup> ) | $V_{OC}$ (V) | FF<br>(%)    | PCE (%)     |
|------------|-----------------------------------|--------------------------------------------|--------------|--------------|-------------|
| No HTL     | 15.32 ± 1.26                      | 12.57                                      | 0.67 ± 0.02  | 47.76±4.72   | 4.92 ± 0.85 |
| 1.62 nm    | 16.84 ± 0.62                      | 13.67                                      | 0.63 ± 0.05  | 55.63 ± 1.73 | 5.93 ± 0.55 |
| 2.00 nm    | 16.71 ± 0.80                      | 13.39                                      | 0.63 ± 0.04  | 52.07 ± 4.69 | 5.53 ± 0.68 |
| 2.27 nm    | 16.03 ± 1.19                      | 13.53                                      | 0.62 ± 0.09  | 48.12 ± 5.56 | 4.89 ± 1.23 |
| 2.54 nm    | 13.91 ± 2.70                      | 11.32                                      | 0.57 ± 0.18  | 39.85 ± 8.75 | 3.47 ± 1.74 |
| Li:PSS A1  | 16.30 ± 0.68                      | 16.50                                      | 0.66 ± 0.06  | 59.77 ± 5.33 | 6.48 ± 1.12 |
| Li:PSS A4  | 16.82 ± 0.74                      | 17.35                                      | 0.67 ± 0.04  | 57.55 ± 5.55 | 6.58 ± 1.00 |
| Li:PSS A7  | 16.83 ± 0.78                      | 17.46                                      | 0.73 ± 0.03  | 62.85 ± 4.91 | 7.73 ± 0.84 |
| Li:PSS A10 | 17.17 ± 0.76                      | 17.72                                      | 0.74 ± 0.01  | 65.17 ± 2.27 | 8.32 ± 0.44 |
| Li:PSS A13 | 17.00 ± 0.96                      | 17.56                                      | 0.74 ± 0.01  | 63.30 ± 2.93 | 7.98 ± 0.73 |
| Li:PSS A16 | 16.97 ± 0.93                      | 16.58                                      | 0.74 ± 0.01  | 65.33 ± 2.19 | 8.23 ± 0.56 |
| Li:PSS M10 | 17.15 ± 0.66                      | 17.16                                      | 0.73 ± 0.01  | 64.41 ± 3.89 | 8.17 ± 0.72 |
| Li:PSS M30 | 17.17 ± 0.82                      | 17.87                                      | 0.73 ± 0.01  | 65.60 ± 2.27 | 8.33 ± 0.53 |
| Li:PSS M50 | 17.12 ± 0.86                      | 17.20                                      | 0.73 ± 0.01  | 64.20 ± 4.25 | 8.10 ± 0.79 |
| Li:PSS M70 | 16.81 ± 1.24                      | 17.64                                      | 0.73 ± 0.01  | 63.20 ± 6.58 | 7.82 ± 1.17 |
| PEDOT:PSS  | 16.99 ± 0.76                      | 14.47                                      | 0.73 ± 0.02  | 64.51 ± 2.85 | 8.09 ± 0.61 |

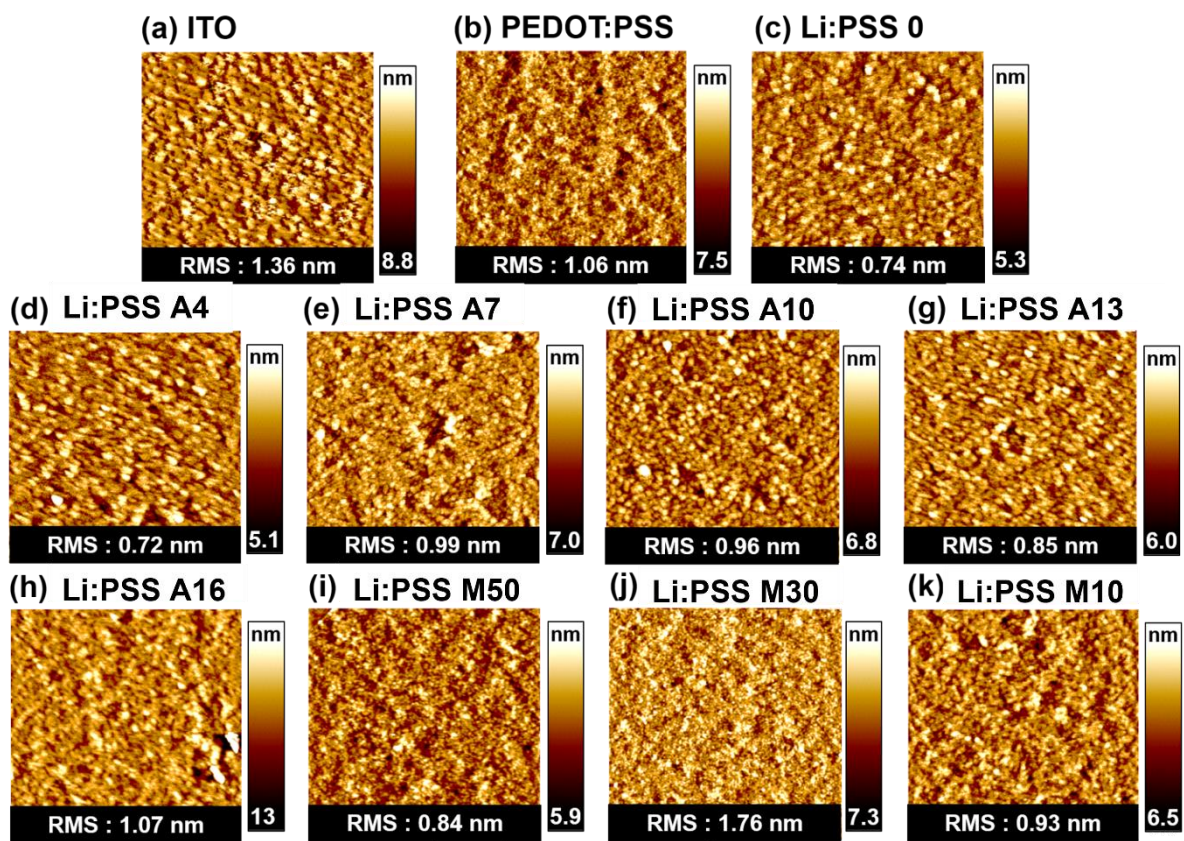

**Figure S4.** Surface topographic AFM images of (a) ITO, (b) ITO/PEDOT:PSS, (c) ITO/Li:PSS 0, (d) ITO/Li:PSS A4, (e) ITO/Li:PSS A7, (f) ITO/Li:PSS A10, (g) ITO/Li:PSS A13, (h) ITO/Li:PSS A16, (i) ITO/Li:PSS M50, (j) ITO/Li:PSS M30 and (k) ITO/Li:PSS M10 films (size: 5  $\mu\text{m}$  x 5  $\mu\text{m}$ ).

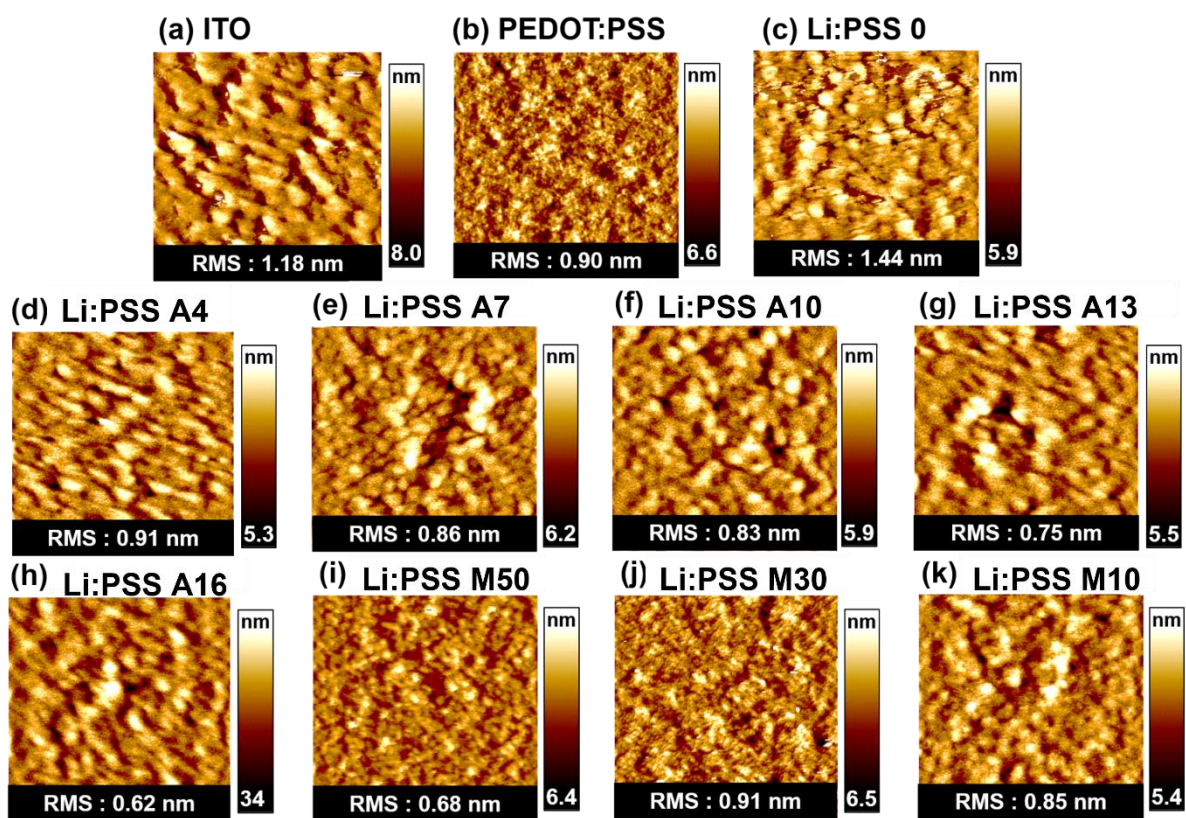

**Figure S5.** Surface topographic AFM images of (a) ITO, (b) ITO/PEDOT:PSS, (c) ITO/Li:PSS 0, (d) ITO/Li:PSS A4, (e) ITO/Li:PSS A7, (f) ITO/Li:PSS A10, (g) ITO/Li:PSS A13, (h) ITO/Li:PSS A16, (i) ITO/Li:PSS M50, (j) ITO/Li:PSS M30 and (k) ITO/Li:PSS M10 films (size: 2  $\mu\text{m}$  x 2  $\mu\text{m}$ ).



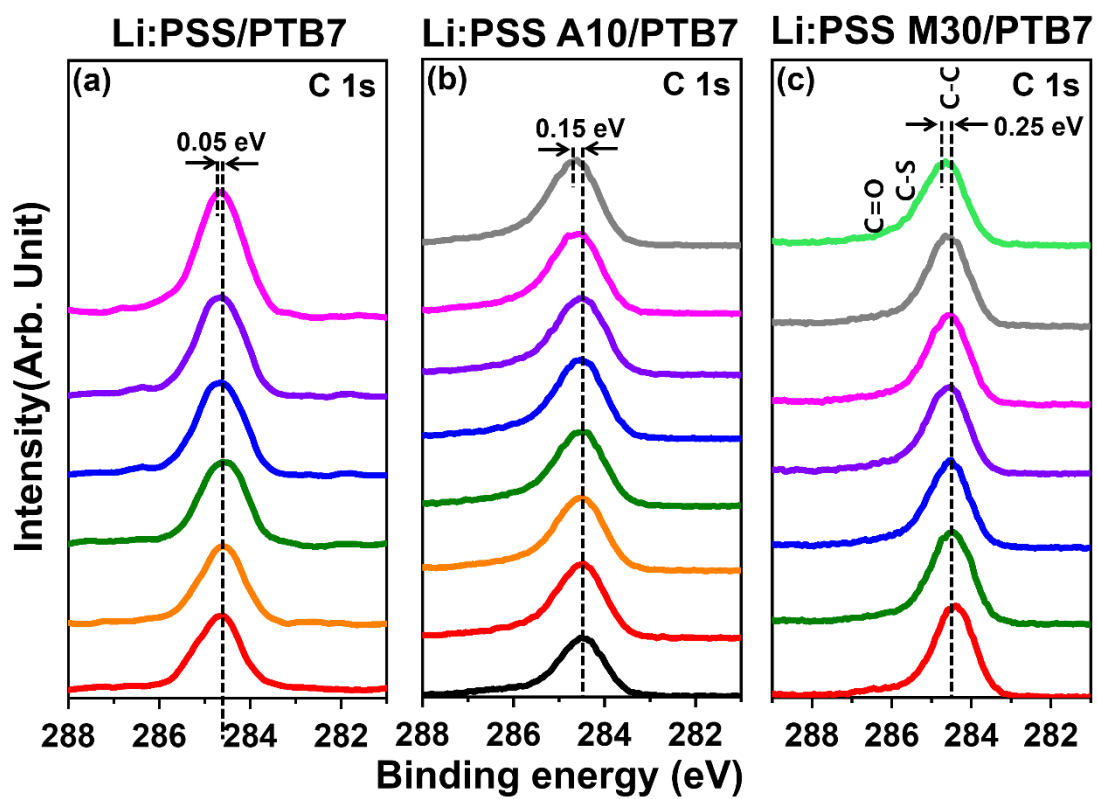

**Figure S6.** XPS spectra in the C 1s region of (a) Li:PSS 0, (b) Li:PSS A10 and (c) Li:PSS M30 deposited on top of ITO.

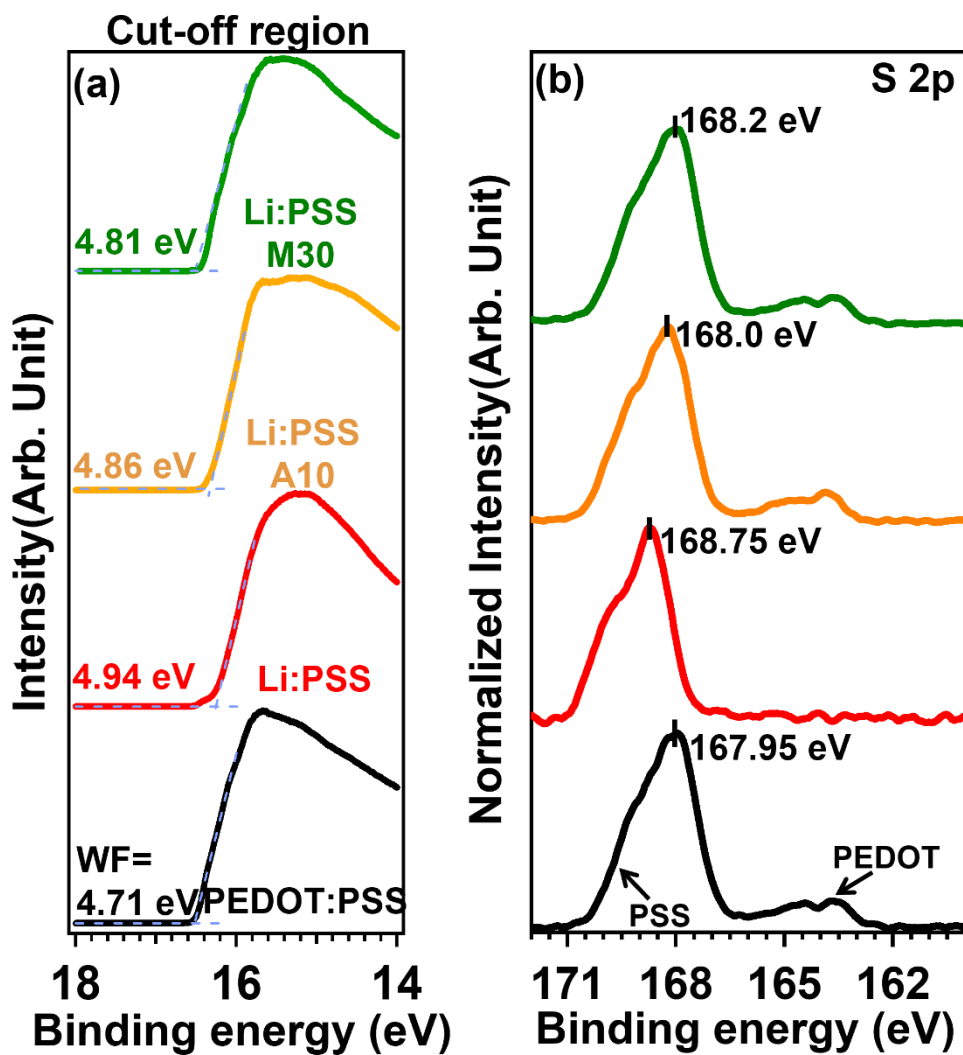

**Figure S7.** UPS showing the secondary edge (left) and XPS showing S 2p peaks of PEDOT:PSS, Li:PSS 0, Li:PSS A10 and Li:PSS M30 deposited on ITO substrates.

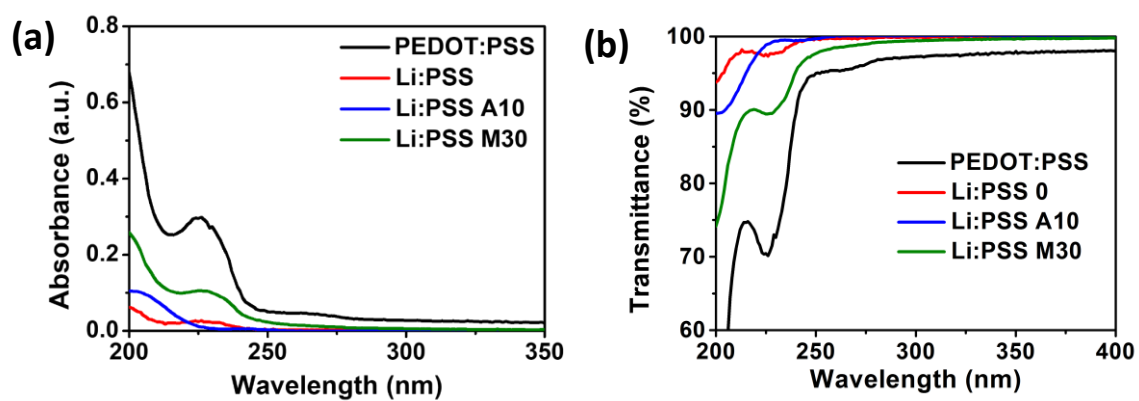

**Figure S8.** UV-Vis absorbance (a) and transmittance (b) spectra of representative HTLs used in this work.
